# Supplementary material
Source: Springer Nature journal article supplement (https://www.springermedizin.de/resource/supplementary/12963_2013_216_MOESM10_ESM.pdf/9572410)
Supplement: MOESM10 [file 9572410]

Change in percent obese (BMI  $\geq 30$ )

Males

Females

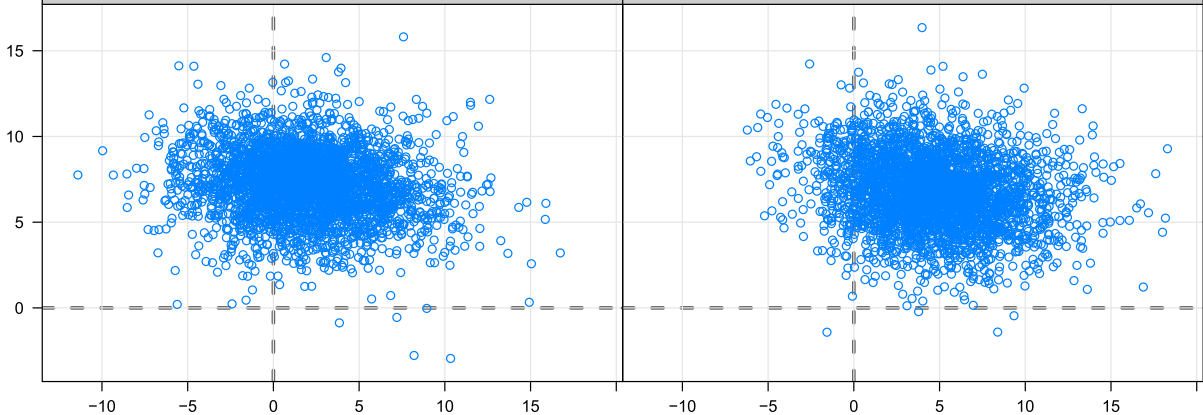

Change in percent reporting sufficient physical activity
